# Supplementary material for: Comparative transcriptomic analysis of two important life stages of Angiostrongylus cantonensis: fifth-stage larvae and female adults
Source: PubMed Central journal article supplement (PMC5488468; doi:10.1590/1678-4685-gmb-2016-0274), 2017
Supplement: 1415-4757-gmb-40-02-0540-Suppl02.pdf [file 1415-4757-gmb-40-02-0540-Suppl02.pdf]

**Table S2** - Summary of the KEGG pathway annotation results for the P transcriptome.

| Pathway Hierarchy1                   | Pathway Hierarchy2               | KEGG Pathway                                | Pathway ID | Gene number |
|--------------------------------------|----------------------------------|---------------------------------------------|------------|-------------|
| Metabolism                           | Amino acid metabolism            | Lysine degradation                          | ko00310    | 225         |
| Metabolism                           | Nucleotide metabolism            | Purine metabolism                           | ko00230    | 122         |
| Genetic Information Processing       | Translation                      | Ribosome                                    | ko03010    | 108         |
| Genetic Information Processing       | Transcription                    | Spliceosome                                 | ko03040    | 100         |
| Genetic Information Processing       | Folding, sorting and degradation | Protein processing in endoplasmic reticulum | ko04141    | 99          |
| Metabolism                           | Overview                         | Carbon metabolism                           | ko01200    | 92          |
| Environmental Information Processing | Signal transduction              | cAMP signaling pathway                      | ko04024    | 91          |
| Cellular Processes                   | Cellular community               | Focal adhesion                              | ko04510    | 90          |
| Genetic Information Processing       | Translation                      | RNA transport                               | ko03013    | 90          |
| Metabolism                           | Energy metabolism                | Oxidative phosphorylation                   | ko00190    | 89          |
| Metabolism                           | Nucleotide metabolism            | Pyrimidine metabolism                       | ko00240    | 83          |
| Organismal Systems                   | Endocrine system                 | Insulin signaling pathway                   | ko04910    | 83          |
| Organismal Systems                   | Endocrine system                 | Oxytocin signaling pathway                  | ko04921    | 83          |
| Environmental Information Processing | Signal transduction              | MAPK signaling pathway                      | ko04010    | 80          |
| Cellular Processes                   | Cell motility                    | Regulation of actin cytoskeleton            | ko04810    | 78          |

| Pathway Hierarchy1                   | Pathway Hierarchy2       | KEGG Pathway                           | Pathway ID | Gene number |
|--------------------------------------|--------------------------|----------------------------------------|------------|-------------|
| Cellular Processes                   | Transport and catabolism | Phagosome                              | ko04145    | 78          |
| Cellular Processes                   | Transport and catabolism | Endocytosis                            | ko04144    | 77          |
| Cellular Processes                   | Transport and catabolism | Lysosome                               | ko04142    | 77          |
| Environmental Information Processing | Signal transduction      | cGMP-PKG signaling pathway             | ko04022    | 77          |
| Environmental Information Processing | Signal transduction      | PI3K-Akt signaling pathway             | ko04151    | 76          |
| Cellular Processes                   | Cell growth and death    | Cell cycle                             | ko04110    | 75          |
| Cellular Processes                   | Cell growth and death    | Oocyte meiosis                         | ko04114    | 74          |
| Environmental Information Processing | Signal transduction      | Rap1 signaling pathway                 | ko04015    | 74          |
| Organismal Systems                   | Nervous system           | Dopaminergic synapse                   | ko04728    | 71          |
| Cellular Processes                   | Cellular community       | Tight junction                         | ko04530    | 68          |
| Genetic Information Processing       | Translation              | mRNA surveillance pathway              | ko03015    | 68          |
| Environmental Information Processing | Signal transduction      | Hippo signaling pathway                | ko04390    | 67          |
| Organismal Systems                   | Circulatory system       | Adrenergic signaling in cardiomyocytes | ko04261    | 65          |
| Organismal Systems                   | Endocrine system         | Thyroid hormone signaling pathway      | ko04919    | 63          |
| Cellular Processes                   | Transport and catabolism | Peroxisome                             | ko04146    | 62          |

| Pathway Hierarchy1                   | Pathway Hierarchy2               | KEGG Pathway                                     | Pathway ID | Gene number |
|--------------------------------------|----------------------------------|--------------------------------------------------|------------|-------------|
| Organismal Systems                   | Circulatory system               | Vascular smooth muscle contraction               | ko04270    | 61          |
| Environmental Information Processing | Signal transduction              | Ras signaling pathway                            | ko04014    | 60          |
| Genetic Information Processing       | Translation                      | Ribosome biogenesis in eukaryotes                | ko03008    | 60          |
| Cellular Processes                   | Cell growth and death            | Meiosis - yeast                                  | ko04113    | 59          |
| Environmental Information Processing | Signal transduction              | AMPK signaling pathway                           | ko04152    | 59          |
| Genetic Information Processing       | Folding, sorting and degradation | Ubiquitin mediated proteolysis                   | ko04120    | 58          |
| Organismal Systems                   | Immune system                    | Platelet activation                              | ko04611    | 58          |
| Metabolism                           | Overview                         | Biosynthesis of amino acids                      | ko01230    | 55          |
| Environmental Information Processing | Signal transduction              | Wnt signaling pathway                            | ko04310    | 53          |
| Organismal Systems                   | Nervous system                   | Neurotrophin signaling pathway                   | ko04722    | 53          |
| Environmental Information Processing | Signal transduction              | Calcium signaling pathway                        | ko04020    | 51          |
| Organismal Systems                   | Endocrine system                 | Melanogenesis                                    | ko04916    | 51          |
| Environmental Information Processing | Signal transduction              | FoxO signaling pathway                           | ko04068    | 50          |
| Organismal Systems                   | Sensory system                   | Inflammatory mediator regulation of TRP channels | ko04750    | 50          |

| Pathway Hierarchy1                   | Pathway Hierarchy2               | KEGG Pathway                                | Pathway ID | Gene number |
|--------------------------------------|----------------------------------|---------------------------------------------|------------|-------------|
| Metabolism                           | Carbohydrate metabolism          | Glycolysis / Gluconeogenesis                | ko00010    | 49          |
| Organismal Systems                   | Immune system                    | Chemokine signaling pathway                 | ko04062    | 48          |
| Cellular Processes                   | Cell growth and death            | Cell cycle - yeast                          | ko04111    | 47          |
| Cellular Processes                   | Cellular community               | Gap junction                                | ko04540    | 46          |
| Environmental Information Processing | Signal transduction              | HIF-1 signaling pathway                     | ko04066    | 45          |
| Genetic Information Processing       | Folding, sorting and degradation | Proteasome                                  | ko03050    | 45          |
| Organismal Systems                   | Nervous system                   | GABAergic synapse                           | ko04727    | 45          |
| Organismal Systems                   | Nervous system                   | Long-term potentiation                      | ko04720    | 45          |
| Metabolism                           | Lipid metabolism                 | Glycerophospholipid metabolism              | ko00564    | 44          |
| Cellular Processes                   | Cellular community               | Adherens junction                           | ko04520    | 43          |
| Metabolism                           | Carbohydrate metabolism          | Amino sugar and nucleotide sugar metabolism | ko00520    | 42          |
| Organismal Systems                   | Endocrine system                 | Estrogen signaling pathway                  | ko04915    | 42          |
| Organismal Systems                   | Immune system                    | Leukocyte transendothelial migration        | ko04670    | 42          |
| Organismal Systems                   | Nervous system                   | Glutamatergic synapse                       | ko04724    | 42          |
| Metabolism                           | Carbohydrate metabolism          | Pyruvate metabolism                         | ko00620    | 40          |
| Organismal Systems                   | Nervous system                   | Serotonergic synapse                        | ko04726    | 40          |

| Pathway Hierarchy1                   | Pathway Hierarchy2                  | KEGG Pathway                               | Pathway ID | Gene number |
|--------------------------------------|-------------------------------------|--------------------------------------------|------------|-------------|
| Organismal Systems                   | Nervous system                      | Synaptic vesicle cycle                     | ko04721    | 40          |
| Environmental Information Processing | Signal transduction                 | Hippo signaling pathway -fly               | ko04391    | 39          |
| Genetic Information Processing       | Folding, sorting and degradation    | RNA degradation                            | ko03018    | 39          |
| Metabolism                           | Carbohydrate metabolism             | Citrate cycle (TCA cycle)                  | ko00020    | 39          |
| Organismal Systems                   | Endocrine system                    | GnRH signaling pathway                     | ko04912    | 39          |
| Organismal Systems                   | Nervous system                      | Cholinergic synapse                        | ko04725    | 39          |
| Environmental Information Processing | Signal transduction                 | ErbB signaling pathway                     | ko04012    | 38          |
| Organismal Systems                   | Digestive system                    | Pancreatic secretion                       | ko04972    | 37          |
| Organismal Systems                   | Environmental adaptation            | Circadian entrainment                      | ko04713    | 37          |
| Organismal Systems                   | Nervous system                      | Retrograde endocannabinoid signaling       | ko04723    | 37          |
| Environmental Information Processing | Signaling molecules and interaction | Neuroactive ligand-receptor interaction    | ko04080    | 36          |
| Metabolism                           | Amino acid metabolism               | Valine, leucine and isoleucine degradation | ko00280    | 36          |
| Organismal Systems                   | Endocrine system                    | Progesterone-mediated oocyte maturation    | ko04914    | 36          |
| Genetic Information Processing       | Translation                         | Aminoacyl-tRNA biosynthesis                | ko00970    | 35          |
| Organismal Systems                   | Excretory system                    | Vasopressin-regulated water reabsorption   | ko04962    | 35          |

| Pathway Hierarchy1                   | Pathway Hierarchy2                 | KEGG Pathway                          | Pathway ID | Gene number |
|--------------------------------------|------------------------------------|---------------------------------------|------------|-------------|
| Organismal Systems                   | Development                        | Axon guidance                         | ko04360    | 34          |
| Organismal Systems                   | Digestive system                   | Salivary secretion                    | ko04970    | 34          |
| Organismal Systems                   | Immune system                      | Fc gamma R-mediated phagocytosis      | ko04666    | 34          |
| Environmental Information Processing | Signal transduction                | Phosphatidylinositol signaling system | ko04070    | 33          |
| Genetic Information Processing       | Transcription                      | RNA polymerase                        | ko03020    | 33          |
| Metabolism                           | Overview                           | Fatty acid metabolism                 | ko01212    | 33          |
| Metabolism                           | Amino acid metabolism              | Arginine and proline metabolism       | ko00330    | 32          |
| Genetic Information Processing       | Replication and repair             | Nucleotide excision repair            | ko03420    | 31          |
| Organismal Systems                   | Digestive system                   | Bile secretion                        | ko04976    | 31          |
| Organismal Systems                   | Immune system                      | T cell receptor signaling pathway     | ko04660    | 31          |
| Environmental Information Processing | Signal transduction                | mTOR signaling pathway                | ko04150    | 30          |
| Metabolism                           | Glycan biosynthesis and metabolism | N-Glycan biosynthesis                 | ko00510    | 30          |
| Organismal Systems                   | Endocrine system                   | PPAR signaling pathway                | ko03320    | 30          |
| Organismal Systems                   | Endocrine system                   | Thyroid hormone synthesis             | ko04918    | 30          |
| Organismal Systems                   | Sensory system                     | Phototransduction - fly               | ko04745    | 30          |
| Genetic Information Processing       | Replication and repair             | DNA replication                       | ko03030    | 28          |

| Pathway Hierarchy1                   | Pathway Hierarchy2                 | KEGG Pathway                                | Pathway ID | Gene number |
|--------------------------------------|------------------------------------|---------------------------------------------|------------|-------------|
| Genetic Information Processing       | Transcription                      | Basal transcription factors                 | ko03022    | 28          |
| Metabolism                           | Glycan biosynthesis and metabolism | Various types of N-glycan biosynthesis      | ko00513    | 28          |
| Metabolism                           | Lipid metabolism                   | Fatty acid degradation                      | ko00071    | 28          |
| Environmental Information Processing | Membrane transport                 | ABC transporters                            | ko02010    | 27          |
| Metabolism                           | Amino acid metabolism              | Cysteine and methionine metabolism          | ko00270    | 27          |
| Metabolism                           | Carbohydrate metabolism            | Fructose and mannose metabolism             | ko00051    | 27          |
| Organismal Systems                   | Circulatory system                 | Cardiac muscle contraction                  | ko04260    | 27          |
| Organismal Systems                   | Digestive system                   | Gastric acid secretion                      | ko04971    | 27          |
| Organismal Systems                   | Immune system                      | Antigen processing and presentation         | ko04612    | 27          |
| Metabolism                           | Carbohydrate metabolism            | Starch and sucrose metabolism               | ko00500    | 26          |
| Metabolism                           | Metabolism of other amino acids    | Glutathione metabolism                      | ko00480    | 26          |
| Organismal Systems                   | Endocrine system                   | Insulin secretion                           | ko04911    | 26          |
| Environmental Information Processing | Signal transduction                | Notch signaling pathway                     | ko04330    | 25          |
| Environmental Information Processing | Signal transduction                | VEGF signaling pathway                      | ko04370    | 25          |
| Metabolism                           | Amino acid metabolism              | Alanine, aspartate and glutamate metabolism | ko00250    | 25          |

| Pathway Hierarchy1                   | Pathway Hierarchy2               | KEGG Pathway                                | Pathway ID | Gene number |
|--------------------------------------|----------------------------------|---------------------------------------------|------------|-------------|
| Metabolism                           | Lipid metabolism                 | Glycerolipid metabolism                     | ko00561    | 25          |
| Organismal Systems                   | Digestive system                 | Protein digestion and absorption            | ko04974    | 25          |
| Organismal Systems                   | Endocrine system                 | Adipocytokine signaling pathway             | ko04920    | 25          |
| Organismal Systems                   | Immune system                    | Fc epsilon RI signaling pathway             | ko04664    | 25          |
| Environmental Information Processing | Signal transduction              | TGF-beta signaling pathway                  | ko04350    | 24          |
| Metabolism                           | Carbohydrate metabolism          | Inositol phosphate metabolism               | ko00562    | 24          |
| Organismal Systems                   | Endocrine system                 | Prolactin signaling pathway                 | ko04917    | 24          |
| Organismal Systems                   | Nervous system                   | Long-term depression                        | ko04730    | 24          |
| Metabolism                           | Energy metabolism                | Carbon fixation in photosynthetic organisms | ko00710    | 23          |
| Organismal Systems                   | Development                      | Osteoclast differentiation                  | ko04380    | 23          |
| Environmental Information Processing | Signal transduction              | TNF signaling pathway                       | ko04668    | 22          |
| Metabolism                           | Amino acid metabolism            | Tryptophan metabolism                       | ko00380    | 22          |
| Organismal Systems                   | Immune system                    | Natural killer cell mediated cytotoxicity   | ko04650    | 22          |
| Genetic Information Processing       | Folding, sorting and degradation | Protein export                              | ko03060    | 21          |
| Metabolism                           | Amino acid metabolism            | Glycine, serine and threonine metabolism    | ko00260    | 21          |
| Metabolism                           | Carbohydrate metabolism          | Glyoxylate and dicarboxylate metabolism     | ko00630    | 21          |



| Pathway Hierarchy1                   | Pathway Hierarchy2                        | KEGG Pathway                                              | Pathway ID | Gene number |
|--------------------------------------|-------------------------------------------|-----------------------------------------------------------|------------|-------------|
| Metabolism                           | Lipid metabolism                          | Sphingolipid metabolism                                   | ko00600    | 21          |
| Metabolism                           | Xenobiotics biodegradation and metabolism | Drug metabolism - other enzymes                           | ko00983    | 21          |
| Organismal Systems                   | Immune system                             | B cell receptor signaling pathway                         | ko04662    | 21          |
| Cellular Processes                   | Cell growth and death                     | p53 signaling pathway                                     | ko04115    | 20          |
| Environmental Information Processing | Signal transduction                       | Hedgehog signaling pathway                                | ko04340    | 20          |
| Metabolism                           | Carbohydrate metabolism                   | Pentose and glucuronate interconversions                  | ko00040    | 20          |
| Organismal Systems                   | Immune system                             | Toll-like receptor signaling pathway                      | ko04620    | 20          |
| Metabolism                           | Carbohydrate metabolism                   | Galactose metabolism                                      | ko00052    | 19          |
| Metabolism                           | Carbohydrate metabolism                   | Propanoate metabolism                                     | ko00640    | 19          |
| Metabolism                           | Metabolism of other amino acids           | □-Alanine metabolism                                      | ko00410    | 19          |
| Organismal Systems                   | Excretory system                          | Endocrine and other factor-regulated calcium reabsorption | ko04961    | 19          |
| Metabolism                           | Carbohydrate metabolism                   | Pentose phosphate pathway                                 | ko00030    | 18          |
| Genetic Information Processing       | Folding, sorting and degradation          | SNARE interactions in vesicular transport                 | ko04130    | 17          |
| Metabolism                           | Lipid metabolism                          | Ether lipid metabolism                                    | ko00565    | 17          |
| Organismal Systems                   | Digestive system                          | Mineral absorption                                        | ko04978    | 17          |

| Pathway Hierarchy1                   | Pathway Hierarchy2                       | KEGG Pathway                            | Pathway ID | Gene number |
|--------------------------------------|------------------------------------------|-----------------------------------------|------------|-------------|
| Environmental Information Processing | Signal transduction                      | Jak-STAT signaling pathway              | ko04630    | 16          |
| Metabolism                           | Carbohydrate metabolism                  | Butanoate metabolism                    | ko00650    | 16          |
| Metabolism                           | Metabolism of terpenoids and polyketides | Terpenoid backbone biosynthesis         | ko00900    | 16          |
| Organismal Systems                   | Excretory system                         | Collecting duct acid secretion          | ko04966    | 16          |
| Genetic Information Processing       | Replication and repair                   | Base excision repair                    | ko03410    | 15          |
| Genetic Information Processing       | Replication and repair                   | Fanconi anemia pathway                  | ko03460    | 15          |
| Metabolism                           | Amino acid metabolism                    | Tyrosine metabolism                     | ko00350    | 15          |
| Metabolism                           | Energy metabolism                        | Carbon fixation pathways in prokaryotes | ko00720    | 15          |
| Metabolism                           | Lipid metabolism                         | Arachidonic acid metabolism             | ko00590    | 15          |
| Metabolism                           | Lipid metabolism                         | Fatty acid elongation                   | ko00062    | 15          |
| Genetic Information Processing       | Replication and repair                   | Mismatch repair                         | ko03430    | 14          |
| Metabolism                           | Energy metabolism                        | Methane metabolism                      | ko00680    | 14          |
| Metabolism                           | Metabolism of cofactors and vitamins     | Pantothenate and CoA biosynthesis       | ko00770    | 14          |
| Metabolism                           | Metabolism of cofactors and vitamins     | Retinol metabolism                      | ko00830    | 14          |
| Metabolism                           | Overview                                 | 2-Oxocarboxylic acid metabolism         | ko01210    | 14          |
| Organismal Systems                   | Environmental adaptation                 | Plant-pathogen interaction              | ko04626    | 14          |

| Pathway Hierarchy1 | Pathway Hierarchy2                        | KEGG Pathway                                               | Pathway ID | Gene number |
|--------------------|-------------------------------------------|------------------------------------------------------------|------------|-------------|
| Organismal Systems | Excretory system                          | Proximal tubule bicarbonate reclamation                    | ko04964    | 14          |
| Cellular Processes | Cell growth and death                     | Apoptosis                                                  | ko04210    | 13          |
| Metabolism         | Glycan biosynthesis and metabolism        | Glycosaminoglycan biosynthesis - heparan sulfate / heparin | ko00534    | 13          |
| Metabolism         | Glycan biosynthesis and metabolism        | Other glycan degradation                                   | ko00511    | 13          |
| Metabolism         | Xenobiotics biodegradation and metabolism | Drug metabolism - cytochrome P450                          | ko00982    | 13          |
| Organismal Systems | Development                               | Dorso-ventral axis formation                               | ko04320    | 13          |
| Organismal Systems | Immune system                             | Cytosolic DNA-sensing pathway                              | ko04623    | 13          |
| Organismal Systems | Sensory system                            | Olfactory transduction                                     | ko04740    | 13          |
| Metabolism         | Amino acid metabolism                     | Histidine metabolism                                       | ko00340    | 12          |
| Metabolism         | Carbohydrate metabolism                   | Ascorbate and aldarate metabolism                          | ko00053    | 12          |
| Metabolism         | Glycan biosynthesis and metabolism        | Other types of O-glycan biosynthesis                       | ko00514    | 12          |
| Metabolism         | Lipid metabolism                          | Biosynthesis of unsaturated fatty acids                    | ko01040    | 12          |
| Metabolism         | Metabolism of cofactors and vitamins      | Porphyrin and chlorophyll metabolism                       | ko00860    | 12          |
| Organismal Systems | Excretory system                          | Aldosterone-regulated sodium reabsorption                  | ko04960    | 12          |
| Organismal Systems | Sensory system                            | Phototransduction                                          | ko04744    | 12          |
| Cellular Processes | Transport and catabolism                  | Regulation of autophagy                                    | ko04140    | 11          |

| Pathway Hierarchy1                   | Pathway Hierarchy2                        | KEGG Pathway                                           | Pathway ID | Gene number |
|--------------------------------------|-------------------------------------------|--------------------------------------------------------|------------|-------------|
| Genetic Information Processing       | Replication and repair                    | Homologous recombination                               | ko03440    | 11          |
| Metabolism                           | Lipid metabolism                          | □-Linolenic acid metabolism                            | ko00592    | 11          |
| Metabolism                           | Metabolism of cofactors and vitamins      | One carbon pool by folate                              | ko00670    | 11          |
| Metabolism                           | Metabolism of other amino acids           | Selenocompound metabolism                              | ko00450    | 11          |
| Metabolism                           | Xenobiotics biodegradation and metabolism | Metabolism of xenobiotics by cytochrome P450           | ko00980    | 11          |
| Organismal Systems                   | Digestive system                          | Carbohydrate digestion and absorption                  | ko04973    | 11          |
| Environmental Information Processing | Signal transduction                       | MAPK signaling pathway - yeast                         | ko04011    | 10          |
| Metabolism                           | Glycan biosynthesis and metabolism        | Glycosaminoglycan degradation                          | ko00531    | 10          |
| Metabolism                           | Glycan biosynthesis and metabolism        | Glycosylphosphatidylinositol (GPI)-anchor biosynthesis | ko00563    | 10          |
| Metabolism                           | Glycan biosynthesis and metabolism        | Mucin type O-glycan biosynthesis                       | ko00512    | 10          |
| Organismal Systems                   | Digestive system                          | Fat digestion and absorption                           | ko04975    | 10          |
| Organismal Systems                   | Environmental adaptation                  | Circadian rhythm                                       | ko04710    | 10          |
| Environmental Information Processing | Signal transduction                       | NF-kappa B signaling pathway                           | ko04064    | 9           |
| Environmental Information Processing | Signal transduction                       | Two-component system                                   | ko02020    | 9           |

| Pathway Hierarchy1                   | Pathway Hierarchy2                          | KEGG Pathway                           | Pathway ID | Gene number |
|--------------------------------------|---------------------------------------------|----------------------------------------|------------|-------------|
| Genetic Information Processing       | Folding, sorting and degradation            | Sulfur relay system                    | ko04122    | 9           |
| Metabolism                           | Biosynthesis of other secondary metabolites | Isoquinoline alkaloid biosynthesis     | ko00950    | 9           |
| Metabolism                           | Energy metabolism                           | Nitrogen metabolism                    | ko00910    | 9           |
| Metabolism                           | Energy metabolism                           | Sulfur metabolism                      | ko00920    | 9           |
| Metabolism                           | Lipid metabolism                            | Fatty acid biosynthesis                | ko00061    | 9           |
| Metabolism                           | Lipid metabolism                            | Steroid hormone biosynthesis           | ko00140    | 9           |
| Metabolism                           | Metabolism of cofactors and vitamins        | Nicotinate and nicotinamide metabolism | ko00760    | 9           |
| Metabolism                           | Metabolism of cofactors and vitamins        | Riboflavin metabolism                  | ko00740    | 9           |
| Organismal Systems                   | Immune system                               | RIG-I-like receptor signaling pathway  | ko04622    | 9           |
| Environmental Information Processing | Signaling molecules and interaction         | ECM-receptor interaction               | ko04512    | 8           |
| Metabolism                           | Amino acid metabolism                       | Phenylalanine metabolism               | ko00360    | 8           |
| Metabolism                           | Biosynthesis of other secondary metabolites | Streptomycin biosynthesis              | ko00521    | 8           |
| Metabolism                           | Metabolism of cofactors and vitamins        | Folate biosynthesis                    | ko00790    | 8           |
| Organismal Systems                   | Digestive system                            | Vitamin digestion and absorption       | ko04977    | 8           |
| Organismal Systems                   | Immune system                               | NOD-like receptor signaling pathway    | ko04621    | 8           |
| Organismal Systems                   | Sensory system                              | Taste transduction                     | ko04742    | 8           |

| Pathway Hierarchy1                   | Pathway Hierarchy2                        | KEGG Pathway                                                            | Pathway ID | Gene number |
|--------------------------------------|-------------------------------------------|-------------------------------------------------------------------------|------------|-------------|
| Environmental Information Processing | Signal transduction                       | MAPK signaling pathway - fly                                            | ko04013    | 7           |
| Metabolism                           | Lipid metabolism                          | Linoleic acid metabolism                                                | ko00591    | 7           |
| Metabolism                           | Xenobiotics biodegradation and metabolism | Aminobenzoate degradation                                               | ko00627    | 7           |
| Organismal Systems                   | Endocrine system                          | Ovarian steroidogenesis                                                 | ko04913    | 7           |
| Metabolism                           | Glycan biosynthesis and metabolism        | Glycosaminoglycan biosynthesis - chondroitin sulfate / dermatan sulfate | ko00532    | 6           |
| Metabolism                           | Xenobiotics biodegradation and metabolism | Caprolactam degradation                                                 | ko00930    | 6           |
| Environmental Information Processing | Signaling molecules and interaction       | Cell adhesion molecules (CAMs)                                          | ko04514    | 5           |
| Environmental Information Processing | Signaling molecules and interaction       | Cytokine-cytokine receptor interaction                                  | ko04060    | 5           |
| Genetic Information Processing       | Replication and repair                    | Non-homologous end-joining                                              | ko03450    | 5           |
| Metabolism                           | Glycan biosynthesis and metabolism        | Glycosphingolipid biosynthesis - lacto and neolacto series              | ko00601    | 5           |
| Metabolism                           | Lipid metabolism                          | Primary bile acid biosynthesis                                          | ko00120    | 5           |
| Metabolism                           | Metabolism of cofactors and vitamins      | Ubiquinone and other terpenoid-quinone biosynthesis                     | ko00130    | 5           |
| Metabolism                           | Xenobiotics biodegradation and metabolism | Benzoate degradation                                                    | ko00362    | 5           |
| Organismal Systems                   | Environmental adaptation                  | Circadian rhythm - fly                                                  | ko04711    | 5           |

| Pathway Hierarchy1 | Pathway Hierarchy2                          | KEGG Pathway                                           | Pathway ID | Gene number |
|--------------------|---------------------------------------------|--------------------------------------------------------|------------|-------------|
| Metabolism         | Amino acid metabolism                       | Phenylalanine, tyrosine and tryptophan biosynthesis    | ko00400    | 4           |
| Metabolism         | Amino acid metabolism                       | Valine, leucine and isoleucine biosynthesis            | ko00290    | 4           |
| Metabolism         | Biosynthesis of other secondary metabolites | Betalain biosynthesis                                  | ko00965    | 4           |
| Metabolism         | Biosynthesis of other secondary metabolites | Tropane, piperidine and pyridine alkaloid biosynthesis | ko00960    | 4           |
| Metabolism         | Glycan biosynthesis and metabolism          | Glycosaminoglycan biosynthesis - keratan sulfate       | ko00533    | 4           |
| Metabolism         | Glycan biosynthesis and metabolism          | Glycosphingolipid biosynthesis - globo series          | ko00603    | 4           |
| Metabolism         | Lipid metabolism                            | Steroid biosynthesis                                   | ko00100    | 4           |
| Metabolism         | Lipid metabolism                            | Synthesis and degradation of ketone bodies             | ko00072    | 4           |
| Metabolism         | Metabolism of other amino acids             | Taurine and hypotaurine metabolism                     | ko00430    | 4           |
| Metabolism         | Metabolism of terpenoids and polyketides    | Geraniol degradation                                   | ko00281    | 4           |
| Metabolism         | Xenobiotics biodegradation and metabolism   | Styrene degradation                                    | ko00643    | 4           |
| Organismal Systems | Endocrine system                            | Renin-angiotensin system                               | ko04614    | 4           |
| Cellular Processes | Cell growth and death                       | Cell cycle - Caulobacter                               | ko04112    | 3           |
| Metabolism         | Biosynthesis of other secondary metabolites | Butirosin and neomycin biosynthesis                    | ko00524    | 3           |
| Metabolism         | Glycan biosynthesis and metabolism          | Glycosphingolipid biosynthesis - ganglio series        | ko00604    | 3           |

| Pathway Hierarchy1                   | Pathway Hierarchy2                          | KEGG Pathway                              | Pathway ID | Gene number |
|--------------------------------------|---------------------------------------------|-------------------------------------------|------------|-------------|
| Metabolism                           | Metabolism of other amino acids             | Cyanoamino acid metabolism                | ko00460    | 3           |
| Metabolism                           | Metabolism of other amino acids             | D-Glutamine and D-glutamate metabolism    | ko00471    | 3           |
| Metabolism                           | Metabolism of other amino acids             | Phosphonate and phosphinate metabolism    | ko00440    | 3           |
| Metabolism                           | Metabolism of terpenoids and polyketides    | Limonene and pinene degradation           | ko00903    | 3           |
| Environmental Information Processing | Membrane transport                          | Bacterial secretion system                | ko03070    | 2           |
| Metabolism                           | Biosynthesis of other secondary metabolites | Indole alkaloid biosynthesis              | ko00901    | 2           |
| Metabolism                           | Energy metabolism                           | Photosynthesis - antenna proteins         | ko00196    | 2           |
| Metabolism                           | Metabolism of cofactors and vitamins        | Lipoic acid metabolism                    | ko00785    | 2           |
| Metabolism                           | Metabolism of cofactors and vitamins        | Vitamin B6 metabolism                     | ko00750    | 2           |
| Metabolism                           | Metabolism of terpenoids and polyketides    | Polyketide sugar unit biosynthesis        | ko00523    | 2           |
| Metabolism                           | Overview                                    | Degradation of aromatic compounds         | ko01220    | 2           |
| Metabolism                           | Xenobiotics biodegradation and metabolism   | Bisphenol degradation                     | ko00363    | 2           |
| Metabolism                           | Xenobiotics biodegradation and metabolism   | Chloroalkane and chloroalkene degradation | ko00625    | 2           |
| Organismal Systems                   | Environmental adaptation                    | Circadian rhythm - plant                  | ko04712    | 2           |
| Organismal Systems                   | Immune system                               | Hematopoietic cell lineage                | ko04640    | 2           |
| Metabolism                           | Amino acid metabolism                       | Lysine biosynthesis                       | ko00300    | 1           |



| Pathway Hierarchy1 | Pathway Hierarchy2                          | KEGG Pathway                                          | Pathway ID | Gene number |
|--------------------|---------------------------------------------|-------------------------------------------------------|------------|-------------|
| Metabolism         | Biosynthesis of other secondary metabolites | Aflatoxin biosynthesis                                | ko00254    | 1           |
| Metabolism         | Biosynthesis of other secondary metabolites | Caffeine metabolism                                   | ko00232    | 1           |
| Metabolism         | Biosynthesis of other secondary metabolites | Flavone and flavonol biosynthesis                     | ko00944    | 1           |
| Metabolism         | Biosynthesis of other secondary metabolites | Novobiocin biosynthesis                               | ko00401    | 1           |
| Metabolism         | Biosynthesis of other secondary metabolites | Stilbenoid, diarylheptanoid and gingerol biosynthesis | ko00945    | 1           |
| Metabolism         | Energy metabolism                           | Photosynthesis                                        | ko00195    | 1           |
| Metabolism         | Lipid metabolism                            | Cutin, suberine and wax biosynthesis                  | ko00073    | 1           |
| Metabolism         | Metabolism of cofactors and vitamins        | Biotin metabolism                                     | ko00780    | 1           |
| Metabolism         | Metabolism of cofactors and vitamins        | Thiamine metabolism                                   | ko00730    | 1           |
| Metabolism         | Metabolism of terpenoids and polyketides    | Biosynthesis of ansamycins                            | ko01051    | 1           |
| Metabolism         | Metabolism of terpenoids and polyketides    | Biosynthesis of vancomycin group antibiotics          | ko01055    | 1           |
| Metabolism         | Metabolism of terpenoids and polyketides    | Insect hormone biosynthesis                           | ko00981    | 1           |
| Metabolism         | Metabolism of terpenoids and polyketides    | Zeatin biosynthesis                                   | ko00908    | 1           |
| Metabolism         | Xenobiotics biodegradation and metabolism   | Polycyclic aromatic hydrocarbon degradation           | ko00624    | 1           |
| Organismal Systems | Immune system                               | Complement and coagulation cascades                   | ko04610    | 1           |
